# Supplementary material for: The Susceptibility of Pseudomonas aeruginosa Strains from Cystic Fibrosis Patients to Bacteriophages
Source: PLoS One. 2013 Apr 24;8(4):e60575. doi: 10.1371/journal.pone.0060575 (PMC3634792; doi:10.1371/journal.pone.0060575)
Supplement: Table S2 — Combined list of spacers from Cady et al. [39] and from the present study. (XLS) [file pone.0060575.s008.xls]

## Sheet: Sheet1
key	N°_Cady et al.a	AnnotatedSpacer	sequence
1	2	list:1	AAAAATCACGTTCATCGAAAATCACACGTGAT
2	3	list:2	AAAAGGGCACGCCGTGGGTCGGCGACGTGTTC
3	4	list:3	AAAATCTTCGAGGCCTTCTTACGGATCGTGAA
4	7	list:4	AAAGCGCAAACGATGGGCTACCGCTACTACAT
5	10	list:5	AACAGGCATTCACTGGGTCGTCATCGACAGCC
6	12	list:6	AACATCGACGGGTCGAACTGCTCCGGCACCTG
7	13	list:7	AACCACCCCGCCCCGGTTCGCCGGGGCATCGA
8	14	list:8_C1-1:15_C6-19:8_C8-5:18	AACCAGCGTGTCGATGCCGAAGCGAAGGCCCG
9	15	list:9	AACCAGCTGCGCTCCTCGGCGTTGTAGAACAT
10	19	list:10	AACCTCTACGAGCAGACCGAGTTGAAAGGGCA
11	20	list:11	AACGCGATATCGGACAGCGAACCGCCAGCGTG
12	21	list:12	AACGCGCTGACGGCCTGCGACGGTCGGGACAT
13	22	list:13	AACGTCGTGGAGAACCTGCGCGTGGCCGACAA
14	23	list:14	AACTACTTCAAGGACCAGCACGACGCGCAGGT
15	24	list:15_C1-7:1_C2-3:1_C3-16:1	AACTCAAAATTGCCCAATCAAACCGCGGGATA
16	25	list:16	AACTGATGGGTTCGGAGGCGGACGAACTCGAT
17	28	list:17	AACTGGTGTTCTTCGGGAACCAAGTCGGCAAC
18	29	list:18	AACTTCGCATGCGCCTCGTTCATGCCGGCGAT
19	31	list:19	AAGAATGAAACTGGAGCCGACCTATACGTATT
20	32	list:20	AAGACAAACGGCCAGAACTGTTCGGCGGATTC
21	33	list:21_C5-12:3	AAGACGCGATGACCCGGGCGATGATCCACCGC
22	34	list:22	AAGAGGATGACGGTGAGCCGTGCCCGGAATGC
23	35	list:23	AAGAGGCTCACATCGCTCATAGCGTCCTGGGC
24	36	list:24	AAGAGGTTCATGTTGAACCAGTAGTCCGGGAA
25	37	list:25_C10-5:11_C5-2:11_C6-1:11	AAGAGTCGCGGCGACAACTACCAGACGTCCGC
26	38	list:26_C1-7:8_C2-3:8_C3-16:8	AAGATGGTCGACGTGCTGATCCTGGCAATGCG
27	39	list:27	AAGCGCTGCGGGCTGTCGCGTTGCGCTGCTCG
28	40	list:28	AAGCGGCAGGCATCGGGTGCTCAGGCATCTGA
29	41	list:29	AAGCGGCTGCATAAGGACCCGGACAATCCGGA
30	42	list:30	AAGCTGATCGACACCAGCGGTCGCTTCTCAAA
31	43	list:31	AAGCTGGGCGAACTGGTCTACGACGATGACGG
32	44	list:32	AAGGACCGCGTCCGCGTGCTGCTGGAGACGAT
33	45	list:33_C1-1:7	AAGGACTCTGATCTCTTGACTCACCATTTCCT
34	46	list:34	AAGGACTTGGCCGGCTTGAAGAGCTACCTGGG
35	48	list:35_C1-19:14	AATCCAGGTGACGTCGTGCATCTGGGACTCGT
36	49	list:36	AATCCATTTGCCCTGATACGGGAAGAGAGGAA
37	50	list:37_C1-1:12_C1-15:7_C6-19:5	AATCCGAGGCGGAGTTCAGCCACTTGGCATAG
38	51	list:38	AATCGCAAGCGCATGGTGACCGGTTATCGTGA
39	53	list:39_C10-5:5_C5-2:5_C6-1:5	AATCTGAAACGCATTGGCGAAATACACCACCG
40	54	list:40	AATGCCCGGACTTGCCGGGCTAATGAGGGGTA
41	55	list:41	AATGCCGAACCGCTGCAGCCAGGTATCGGGCC
42	56	list:42_C5-12:11_C5-2:16_C6-1:12_C6-4:12_C9-14:17	AATGCGGTCCTGCGCATCCGAACTGGTAAGTG
43	57	list:43	AATGGAGAGCAGTTCAGGTGCCGCAGCAATCA
44	59	list:44_C9-11:10	AATTGCGGCACGATTGAGGATCACCCAAGCTA
45	60	list:45	ACAAAGTTCTCAACATAGCCATCTGCAATTGA
46	61	list:46_C10-5:14_C5-12:10_C5-2:14_C6-4:10_C9-14:16	ACAACATCAATCGCCTGATGCTGGGGCACCTG
47	62	list:47	ACACCCTAGGCTTCGCATAATGTGCAGACGTT
48	63	list:48	ACAGACGACTGTCTGTGCGCGGCGCTCTGCGA
49	65	list:49	ACAGGTGATCCAGCACCAGGCCGTCAGGTATC
50	66	list:50	ACATCCGATTCACCGGATACAGCTGGTTTTCA
51	69	list:51	ACATTCATGCGAGACGGGATCAAGCGATTGAT
52	71	list:52_C1-1:18_C1-15:13_C6-19:11_C8-5:19	ACCAGCTGCTGCGAGTGCTGGTTCGCGCTGGC
53	72	list:53	ACCATAGGGCCGAATGAAGTTGATGTGCTTGC
54	73	list:54	ACCATCAGGACGTGCCAGATGATTCCGCCAGT
55	74	list:55	ACCATGCTGGTCGTCACGGCTCCCATTGTTCT
56	75	list:56_C2-21:3_C5-14:1	ACCCAGGACGCCATCCGGCGCATGAGCGAACG
57	76	list:57	ACCCGCAGACAGGCGAGATGATCGACAGTTGGG
58	77	list:58	ACCCGGCGAAACCCTGCATATCGGCGACAACA
59	83	list:59	ACGAAACCATCGAGGATGAAACCCGCGACGAT
60	85	list:60	ACGACGGCCGCCTTGCGGATCTCGGCAGCGGA
61	86	list:61	ACGATCCCGACCGCCAAGATTGGCCGTCGCCG
62	87	list:62	ACGATGGCGTCCAGCAGGGTCGGCTCGATGTT
63	88	list:63	ACGCTACAAAGTCGACGTTGGCACTTTTATGC
64	89	list:64	ACGGCACCGCGGCGAGGCTGACCCATGCCCCGA
65	93	list:65	ACTACCGACAACGCCAGGGCGTAAAGCTGCGG
66	94	list:66	ACTCTGAATGCAGGCGCGAAAGCGCCTCACCC
67	95	list:67	ACTGAAAGAACTTCACAATGCCTGATACAAGC
68	97	list:68	ACTGGCGCCTAACCACCCCGCCCCGGTTCGCT
69	98	list:69	ACTGGTACCGCGCGGGCAATCAGCGAACCCGCG
70	99	list:70_C10-5:6_C5-2:6_C6-1:6	ACTGTTCGAGTCGCGAATGACTCGGTGAACTA
71	103	list:71_C10-5:7_C5-2:7_C6-1:7	AGAACGAAAACTGCTAGCGGCGACGATACCCG
72	104	list:72_C1-1:14_C1-15:9_C6-19:7	AGAAGCGCATCCAGCGATACGAAGATGCACTC
73	105	list:73	AGAAGGCCGGGGTCCGTGTGTGGCGCATTGAC
74	107	list:74	AGAGGTTGGACCCCGGATAGAGGTAAATCGCG
75	109	list:75	AGATTACGTCTGGCATCCTGCCGCTGGCTCGA
76	110	list:76_C5-12:4	AGATTCGCCGCGTCCAGGCCGTCCATTTGCGC
77	113	list:77_C1-19:1	AGCAAGGCATCCGGAAACGGGCCTTGGGTCAC
78	114	list:78_C1-17:19_C2-24:15_C9-17:22	AGCAATGGAAAGCAGCGATGTGACCCGACCCG
79	115	list:79	AGCACGATCCTGGGCGGTGCGCTGGGCACTCC
80	116	list:80	AGCACTTCGGACTCCGACATGGCCGTGATGGA
81	117	list:81_C2-23:14	AGCAGTTCGAATTCGTCATCCAGTTCTAAGGT
82	118	list:82	AGCATGTATCCGTCCGGCACTGCATGGTGCAG
83	120	list:83_C3-7:7	AGCCACAACGGCGAGGCGCTAACAAGGATCGA
84	124	list:84	AGCCTCCGGCGTGGGCGCCGGCACCTACCGTGC
85	125	list:85	AGCCTGCGTCTAGATATGCGGCGCGTTGCTGC
86	126	list:86	AGCGAACCGATAACGCGGAAGGGATACCGACT
87	129	list:87_C10-5:15_C5-2:15_C6-4:11	AGCTTCGGCACCCTGATGCGCGCCGTCGAGGG
88	130	list:88	AGGAATCGCCCACGCGGTAACACACTTCATAC
89	131	list:89	AGGAGTACATGCCGAGGGCGTCTGTGACCATA
90	132	list:90	AGGATGCGCTGCGCTTCCTTGAGCTGGCCCGC
91	134	list:91	AGGCTGATCCGGCGGATCAGGATTCGGGTCCG
92	135	list:92	AGGCTGCCAAGTCGGTGCGCGAGGCCGGCTTT
93	137	list:93	AGGGGCATTTCCTGATCATCCGAGGAGATCGC
94	138	list:94	AGGTACTAGGTGCCGGCGGCCTGGCTGAAACG
95	139	list:95	AGGTGATGCCCACTGTGCAGTCAACTCTTTTC
96	140	list:96	AGGTGGCGGAGAAGATCCCGGCGGCGCTGGGT
97	141	list:97	AGGTGGCTGATGATCGCCAGATCTAACCGAAC
98	142	list:98	AGTACCAGCGATCTGCGAAACCGGACAACTCG
99	144	list:99	AGTCAGTCGGCTCAAGGCCCACCAGGGCGCATA
100	145	list:100	AGTCCCTGGGCAAGCGCCTGATGCCCGGCGTA
101	146	list:101	AGTCGACCTCAACGGTCTGCCAGCCCTTCGAA
102	147	list:102	AGTCTGCAAACGCCCAGGCGTACCAGTTCGAC
103	149	list:103	AGTGCGGGGTTGAAAAGTGGCTGGGGCGTGAT
104	150	list:104	AGTGGGAAGCCATGGTGGCAGAGTCTCAGAAA
105	151	list:105	AGTGGGAAGCTGCTGCTGTACGTGTTCCCTCA
106	152	list:106	ATAAAAGAGGCCGTCAAATACCGATGCGTCCT
107	153	list:107	ATAAACTTCGGTTCCGTAGAGCGCTTCTCCGG
108	155	list:108	ATACAGGCCGTGACGGCCAACAACCCTACTGG
109	156	list:109	ATACCCCGTAGGGTACAGGACTGTCGAAAGAC
110	157	list:110	ATACGCCTGCTGGCCTGGGTGAGAATTTCCGT
111	160	list:111	ATCAAGGCATTGTCCTGCGGGGCTTTGCGGGAT
112	161	list:112	ATCAAGGGGCCGAGCGTGCCGCGCAGCCTGCT
113	162	list:113	ATCAAGTCCGAACTGGGCAATGACGGGTTCAG
114	163	list:114_C1-1:17_C1-15:12_C6-19:10	ATCACCGGAGGCCACGGATTCGCTGTAGCTCA
115	165	list:115	ATCATGACCCAGTTCAACATCATCACCAGCGA
116	167	list:116	ATCCGGCGCATGAGCGAACGCCCCTCCCAGAT
117	168	list:117_C3-7:14_C8-4:14	ATCCGTCACCGGAATTTGCGCGTTGGCCGTGC
118	169	list:118_C1-11:6	ATCCTGATATCCGGCGCTGCTTTGCCGACTAT
119	170	list:119	ATCGAGCACCCGGTCGACCGCGTAATGGAGCC
120	171	list:120	ATCGATCATCGCCGCCGAGCCCACCTCGACCT
121	172	list:121	ATCGATGCGGCGAACGGGACAACTACGGTCAT
122	173	list:122	ATCGCAGGACAGGGCAGAAATCATCAGGAAGC
123	174	list:123	ATCGCCGCCACCGTCGCCGCCATCACCATCCC
124	176	list:124	ATCGCGGAGAGAAGGGCCTGGTCGAGACGGTA
125	178	list:125	ATCTGGATGCATGGTTCGAAGGGGAGGAGTGC
126	179	list:126	ATCTTCACGCCGGTGCCCTGGAGCTTCTTGTC
127	181	list:127	ATGAACGCCTCGATCTCGGTGCGGGACTTCCA
128	182	list:128_C2-21:11_C4-16:9_C4-17:9_C5-14:7_C8-19:9	ATGACCTGGGCCCGGACCACCTCCAGCCCCTC
129	184	list:129_C9-11:11	ATGAGTCGCTTGATCCCGTCGCGCATGAATGT
130	185	list:130	ATGCAAAGCAAGCGGCTTGAGTTCCCCGAATC
131	186	list:131	ATGCCCAGGTGCCGGTGCTCAGTCACGAACTT
132	187	list:132	ATGCGCGCCGCGGCTGAAATCATTGCGCGAGG
133	188	list:133_C10-5:9_C5-2:9_C6-1:9	ATGCGGATAAGGCCCGCAGGCGCCGAATTGGC
134	189	list:134	ATGCGGGCGAGGGCGGTCTGGGAGAGCAGGCC
135	190	list:135	ATGCGGTCTCGTCTGCTGTGCGATCAGCAGGT
136	192	list:136	ATGGATGCGGAGCAAGTCAGGCGTAACGCATT
137	193	list:137_C2-22:8_C8-13:6_C9-20:8	ATGGATGTCGGAACATCCCAGGTCACGGTCGT
138	194	list:138	ATGGCCACCTCGGTTTCCTGCGCCATTTTCAG
139	195	list:139	ATGGTCTCTTCCCACCCGTAGTCCTTGAGGCT
140	196	list:140	ATGGTGTCGGTCCAACCCCACAGATAGCCCGT
141	198	list:141_C9-11:12	ATGTAGTTGCCCTGCATGTTGATTTGCGTGGC
142	200	list:142	ATGTGCTTCCAGCTTTCGTCGTCCAGCTTCCG
143	201	list:143	ATGTGTGATTTCACCTCGCCATCACGTGTGAT
144	203	list:144	ATTGTGGGTCGCCAGCTGCAGACGTTCACGAC
145	204	list:145	CAACGCTTGGCGCGCTGCGAGGCGCTGGCGAA
146	206	list:146_C2-21:12_C4-16:10_C4-17:10_C5-14:8_C8-19:10	CACATGTGCGCTTCGGCGATGGTGTCGGCCAG
147	207	list:147	CACCACCGGTCTCCGGTCGTGAATATCGACCA
148	208	list:148	CACCACGCGCTTGGCTGGGAACAGCGGCGACA
149	209	list:149_C5-12:1	CACCAGCACCGAGTTGGACGCCGACACCGAGC
150	210	list:150	CACCAGGGTCTTTAGGATCAGTCGGGTCCGTA
151	212	list:151	CACGCCGATGGCGATGTTCAGGGCCTGGCTCA
152	214	list:152	CAGACGTTACGTTAGGCGCAGCCCGACCGAGG
153	215	list:153_C10-5:10_C5-2:10_C6-1:10	CAGCAGCGGCTCCAGGAAGAGGGGCGCTGCCT
154	216	list:154	CAGCCGAACCGCCAGGGTCGAGTCGCCGTCCT
155	217	list:155	CAGCGGGCCACCTGGCTGCAGTTGCTGACCAG
156	218	list:156_C1-7:7_C2-3:7_C3-16:7	CAGGAACGTTTGCTCGCGCTTTGATCTCAAGC
157	219	list:157	CAGGCAGCGCCCCTCTTTCTGGAGCCGCTGCT
158	220	list:158	CAGGCGTGCGTAGATCCAGGCGAACTTCGCCC
159	223	list:159	CATCCAGTGGGTGGTTTCAGGTCGCTCTACAT
160	224	list:160	CATCGACGGCCGTGACGACGCTACGACTCGAA
161	225	list:161	CATGACACTGGCCGAATACGTCTCCCAGCAAT
162	226	list:162	CATGTCGTCTGGTCGCGCAGTGTTTTTGTGCA
163	227	list:163	CATTCTTCATGATGCTGCCGGCGAACGTCATT
164	228	list:164_C3-7:10	CCACCATGTCGGCGGTGATCGTCACCGGCACC
165	229	list:165	CCACTGGGTTACCCCGTATTGGTAGAGGGTTC
166	230	list:166	CCAGAGACAACCGCCTGAGGCGCGACGTTTCC
167	231	list:167	CCAGCTAGTGAGCCTTACTAGCACGTCGGGCA
168	233	list:168	CCATGAAGGGTTCCTTCCGCGCCGTAGAGCAG
169	234	list:169	CCCATATGTCGCAATGTTCTATACCAACAGAA
170	235	list:170	CCCGAGATCGGCGTCAGCGCTCGGTGTTTCCA
171	236	list:171	CCCGCGCGGCAATAAGGTGAAACTGGGAGACG
172	237	list:172	CCCGCGCTAGGCGGCCTTGGGTTTGTGCATCA
173	238	list:173	CCCGGCCAGGTGCTCGAGCGCGAGCAACTGCG
174	241	list:174	CCGGATCGTTCGGATCGGAAGGCGGGTCGGTCA
175	242	list:175	CCGGGAATGAACGTTCCCATGTCGGCTACGCC
176	244	list:176	CCGGGGATGTCCGAGGAACAACTTGCGCAGAA
177	245	list:177	CCGGGGTGGCCAGTGTTCCAAGCCTTGAGCAA
178	246	list:178	CCGGTCGTCCGCTACATCCTGGGATGGGTCAA
179	248	list:179	CCGTGGTCACCTTTGTCCCGGTGACTCGCTAA
180	249	list:180	CGAAACCGAAACCGCCGCGACCCAGGAGCGCA
181	250	list:181	CGAAGGCACGCAAGACCGGCGTCACGCGCCAG
182	251	list:182	CGAGTTCATGGCCTCTTGCTTCGGCAAGAACT
183	252	list:183	CGATGGCCGCGACGCGCCTCGATGCCGGTCTG
184	254	list:184_C1-1:11_C6-19:4	CGCAAAGCCCCGCAGGACAATGACTTGATATC
185	255	list:185	CGCACGGGGGACGAGTTCGCAGCGCATTCGCG
186	256	list:186	CGCATATGGGGCATCCGGGGAGGGTTGCGCCA
187	257	list:187	CGCGACATCGGTGTGGGCGAGGACGTCTACCT
188	258	list:188	CGCGACCGGACCGAACCCGACAGAGAACGCCT
189	259	list:189_C1-1:8	CGCTGCCATCCGGCGCATTTCCCTCTCATAGC
190	260	list:190	CGCTGTAACCGCTTGCCAGCACTCCTGAATCA
191	261	list:191	CGGAACGGGTGGCGGTGACGGTGGGACCGGTG
192	262	list:192_C5-12:2	CGGAAGAAACGGCACTGCACCGCAGTTCGGCG
193	263	list:193	CGGCCGGGCTTACCGGTGAAGGCGTGGCTGAT
194	264	list:194	CGGGATAACAGTGGGAATCAGTCTGTAGGCTT
195	266	list:195	CGGGCGGTCTGGCTGCTGCGGCGGCTGTGACT
196	267	list:196	CGGGTTGGCGCCATTGAAGAACAGGTCACGCA
197	268	list:197	CGGTGCATGTAAGTGGAGACAGGGCGCTTGGC
198	270	list:198	CGTAAGCATGCAGCTACCGGGTCCATCTGCCA
199	272	list:199	CGTGATGGGCGCCAACATGCCGTCGACACTCC
200	273	list:200	CGTGCCGGCTGGTTTCCGCATGTGCGCGAGAC
201	274	list:201	CTAGGGCAATCTGTATATTCAGCGGTTTCCTA
202	276	list:202	CTCGAAGACCGCGCACGATTCCCAGACAAGCC
203	277	list:203	CTCGACAGCACAGACCGTGCGCCATCCGAGGA
204	278	list:204	CTCGATCAGTTGGCGAGCTGGGCCACGTTGCT
205	280	list:205	CTCGTACGAGACCGAGCGGATCACCATGCCTG
206	281	list:206	CTCTCCCACACCTCGGCATTGCCGAGCGCATC
207	282	list:207	CTGCCCCGCTCTACACCCAGCCTGGGGCTTCCT
208	283	list:208	CTGCCTGATTTTCCTACCGAAAGCAGGGCGCA
209	285	list:209	CTGCTCGGCGATGATCACCGCGGCATTCTTCG
210	287	list:210	CTTATATCCAATGTGGTTTCACAGAATCTCGT
211	288	list:211	CTTCGGAGTTACCCGGTAGCATTCAGCCGGGA
212	289	list:212	CTTCTCCGGCAGCAGATGCCAGAGCGCTTGCA
213	290	list:213	CTTGAAATTACTGAGCACGGCGTTTTCCCGAA
214	291	list:214	CTTGCCAACGAGGAGCGGCGGCTGGCGTCGGT
215	292	list:215	CTTGGCCTAAATCCGGCATCAATATCGTTATA
216	293	list:216	CTTTCGCAAGTTCCTCGCGAGCTTTGGCGGCG
217	295	list:217	GAAACCCCCGGGGTGATCACCCACAGGCAAGT
218	296	list:218	GAAACGCTGACGTGCATAGCGCCGCATCATGT
219	297	list:219	GAAATGCTGGCTCGGCTGACAAAACTTGAGGA
220	298	list:220	GAACAGTTCTGGCCGTTGCTCTTGAGCGTGTA
221	299	list:221	GAACTCCGCGAGCTTTTCGCGCTGCTGCCATT
222	300	list:222	GAACTGGGCGACACCATCGCGCAGATGGACCA
223	301	list:223	GAAGAGTTGGAGGCCATGATCGGCGCCAAGTC
224	302	list:224	GAAGGCTCACCGTCATCGCGCGCGCACCTGGC
225	303	list:225	GAAGGTGAACGATGCGAATCGGGCGGGGGTTT
226	304	list:226	GAATGTCCGGTGGCTTGGAGTTCGTGCGGATA
227	305	list:227	GACAACCAGCTGGCTCAGCCGGTTGTGCTCAA
228	306	list:228_C10-5:1_C5-2:1_C6-1:1	GACAAGAAACTGTTGGCCGAGCATCGGCACCG
229	309	list:229	GACATCGTCCCATTCCTCTGCTACATCGCGAA
230	310	list:230	GACATGCCAGGCCCGAAAGACCCGAACTGCAA
231	312	list:231_C10-5:16_C5-12:12_C5-2:17_C6-1:13_C6-4:13_C9-14:18	GACCCCCGGAGGACCAACCGTGGACAACGACA
232	313	list:232	GACCGGCGCGCTGTCGAGCCCATCGCCGGCGA
233	314	list:233	GACCTCGGTACGCTGTTCGCCGGAATCGTTAA
234	315	list:234	GACGAACCCGAGGCGAAGACCTGGACGCTCCA
235	316	list:235	GACGATGTGCAGCGTCACCGGTGTGATGGTCT
236	317	list:236	GACGCGAAGGCTTGGGTAGATGGCTATCACGC
237	319	list:237	GACGGCGATGCGGCAACCCTGGCGGCGTCGAA
238	320	list:238_C2-22:15_C9-20:15	GACTTGAAGCCACTGCGCAGGCACGCCACCCA
239	321	list:239	GAGAAGCAGCACGGCGTCAATGGGCCATTTAT
240	322	list:240	GAGACGGCCTAGATTGCTGTTGCTGGGACTGC
241	323	list:241	GAGACTTCAAGACGTTCCGGCGCGGCCGGAGC
242	325	list:242	GAGATTGTCGGCGAGCTGATCCGCTTCATTTT
243	326	list:243	GAGATTGTCGGCGAGCTGATCCGTTTCATTTT
244	327	list:244	GAGCAGAtCCGCTATGGCATTCAGCAATGCCG
245	328	list:245	GAGCAGATCCGCTATGGCATTCAGCAATGCCG
246	329	list:246_C9-11:9	GAGCAGTTCTGGCCGTTGCTCTTAAGCGTGTA
247	331	list:247	GAGCCTTGGCCAGTTCCTTGGAC
248	332	list:248	GAGCGCTGATTCGCTGACCGTCAGGCCGTTGA
249	333	list:249	GAGCTAGCCCGGCGCCTAGGGGTTTCGCCCCA
250	334	list:250	GAGGAGCACGGGACGATAACAAGCGCAAAGGG
251	335	list:251	GAGGAGGAGGGAGAGGGAAGGAGAGGAAGGAG
252	336	list:252	GAGGGGCCGTATCGACGGTGATTGATGCGACA
253	337	list:253	GAGGGTCAGGACTGGGCCACCTACCTGGGCCA
254	338	list:254	GAGGTGTCAATCTGCGACACCGTGCAGAGTCA
255	339	list:255	GAGTATGTCACCTTGATCCTGCGGATGTACCT
256	341	list:256	GAGTCTTGGCCTTGTCCGGGCTGCAACACCTT
257	342	list:257	GAGTGCCAGCGTCGGATAAGCGCCTGGATCAA
258	343	list:258	GATCACTCCCCGCTGCGCATGCAGCGTTCCCC
259	344	list:259	GATCAGGCTAGCCATGACGGGCTCCATTACGC
260	345	list:260	GATCGCCTCGTTCTCCGACCCGACGCCTTCCA
261	346	list:261_C10-5:13_C5-2:13	GATCTGGGGCGGCATCATCACAGCAGAATCTA
262	347	list:262	GATTCGCTCGAGCTTTTACTGCGAGTCGAGTA
263	350	list:263	GCAATGATCCCAGCGGAGGCGGCTAACATGCT
264	351	list:264	GCAATGCGCATGCTGGATAGCTGCAACTGGCT
265	352	list:265	GCACCAGCCGCCACCATGTCGGCCAGGTCATT
266	355	list:266	GCAGTTGCGACGTGTCGCACCCGCTTCGTTCC
267	356	list:267	GCATGCGTCGCAATCGAGAAGGCTGCCAAGAA
268	357	list:268	GCATTGCACGCTGGTGGGCAACGGGTGCGACC
269	358	list:269	GCATTGGGCAGGCCGACCAGCTGATCGATACC
270	359	list:270	GCCAAGGGTGCTGGACACTTCGAGCGTGTTCCT
271	360	list:271	GCCAATGCTGACCGTCCAAGTGCGTTCTTCCA
272	361	list:272	GCCACCACATCGGAGTCATGCACGACCCTGAC
273	362	list:273	GCCAGGTGGCTGACCAGGATCTCGCTGGTCTT
274	363	list:274	GCCAGTTCGTCCATGGCCTGCTTGAGCTGATA
275	365	list:275_C10-5:8_C5-2:8_C6-1:8	GCCCACCAGCTCAGTCCAGGCGCTGCCGGAAT
276	367	list:276	GCCGACATGTTCCGCTCCGGCCTCTTCCCCCC
277	368	list:277	GCCGCAAGCAGGGCAGATACTGGTGGCGAATA
278	369	list:278	GCCGGCCAGGTGCTCGGCCAACAGCTCGCGAA
279	370	list:279	GCCGTCGGCGGCCGACGGAGCAAGCGCAACAGC
280	371	list:280	GCCTGGACGGGCCGAACCAGGTCCAGGCCGCT
281	373	list:281	GCCTTCGGTTGTGATCTTTCCGTTGTTTGCTT
282	375	list:282	GCGATTCGCTGGGTGCCGCCCAACTGGCCATG
283	376	list:283	GCGCAGCTCGATCCTGAGCAGGTCGATGCGTA
284	377	list:284	GCGCAGGGCAAAGCCAAGGTCACCGCCGGCAC
285	378	list:285	GCGCAGTTGGCCCTGCTGAACGCCCTGGACAA
286	380	list:286	GCGCGCCTCGCGATCGTCTTTCTCCTTTCGGA
287	382	list:287	GCGCTGCTGGCCGCTGTGTATGCCGGCATCAA
288	384	list:288	GCGGCCTCTGTGGGCGTTCCTGATGTCGATCA
289	385	list:289	GCGGCTTCTTGAGTGAGCCGAGCGTGGCTACC
290	386	list:290	GCGGGGTCATTTGTCATTGCGCCCATGAGGAT
291	387	list:291_C1-7:2_C2-3:2_C3-16:2	GCGTGCAGCAGATAGCCCTCAAGGAAGCTCAA
292	388	list:292	GCTACGCAATAGCTGCGCGGGGTGCCGCTGCC
293	389	list:293	GCTCAAGGTCGTAACCTCGGCAGGCTGGGCAT
294	390	list:294	GCTCACGCATAGCGCACTACCGCTCACTCAAA
295	391	list:295_C9-11:3	GCTGAACAAATTGCCGAGTTCGAAGCAACTCG
296	392	list:296	GCTGGAGCCGCCGGCAAGACGTTCGGCGAGGC
297	393	list:297	GCTTCAAAATGCTGCGCATGCGTGACCGTCAC
298	394	list:298	GCTTGGATTCTTCTGCGTATGCGAAGCCGCAC
299	397	list:299	GGCAAGAAAGGCTGGGGCAAGGCTCCGCTCTGC
300	398	list:300	GGCAGAAGTCGCCGGACGTCCGCTCTTCGAAT
301	399	list:301	GGCATGCGCGTGACCGAGCTGGCCTTACTGGA
302	400	list:302	GGCATGCGGCGATCCGGCCGGCGGAGCCGAAA
303	402	list:303	GGCCCGACTGGGGCCGGTAAATCGACCTTGCT
304	403	list:304	GGCCTGGGTCGGGCTGAGGCGTGGCCGTCGAA
305	404	list:305	GGCCTGTAACGCCGGCTCCAGCAAGTACGCCA
306	405	list:306	GGCGAGCTACCGCCGACGTGGGGCCACTACGA
307	406	list:307	GGCGCGGCACGCTTGGCATGCGGGGACTTACG
308	407	list:308	GGCGGGGATGGAAGCTTGCGCTCGGGGATGCC
309	408	list:309	GGCGGTCgTCaGCTCAGTGTAGAGTCGGGAGG
310	410	list:310	GGGAAGTTTGATCAGCATGGCAATCTCCTTTA
311	411	list:311	GGGAATGGCGTTCGCGTCGCCCATTTTCATGA
312	412	list:312_C1-1:3	GGGAGGGCATGTGATGCGAGCAGACGAGTACC
313	414	list:313	GGGCAATGATCCACCGCGAGTTGCCCCAAGCG
314	415	list:314	GGGCACGCCGTGGGTTGGTGATGCATTCGGGT
315	416	list:315_C1-1:4	GGGCCCGACGGCTAGTAATTCGCGGAGGATGG
316	417	list:316	GGGGGAGCTTTGACCAAGGCCCGCGTGCGCAT
317	418	list:317	GGGTTTTGACTATTGTCGGACCCGCTCTGGAG
318	422	list:318_C9-11:1	GGTCGGTGACGGCACCATTGGCGGCCAGGTCA
319	488	list:319_C9-11:2	TCACGAATCACGAGAACGGTCCGATTCCGGGG
320	490	list:320_C1-1:2_C6-19:2	TCAGGCTCATTTCGTTGTCCTCGATGCCCCGG
321	491	list:321	TCATAGGGCTGCGGCAGGTTGACCACGTCGCT
322	493	list:322	TCCAGCGAGCGGTGGGCTTCGTGCTCCCTCCA
323	494	list:323	TCCAGGGGATCGGGCCTGCGTTTGGGAACCCG
324	495	list:324	TCCCATTCCTTGCCGTCGCGCTTGAACTTGTA
325	496	list:325	TCCCGCGGATACATGATCTGGTGGTGTCGCTC
326	497	list:326	TCCGCCGCGTGCTGCGCGATGACGGCACGCTG
327	498	list:327	TCCGGCGCTAATCGCACACTTCTCTTGCACTT
328	500	list:328	TCCGTACCTTTGAGTGGGTGCGCGTATACCCG
329	501	list:329_C5-12:8_C6-4:2	TCCTAGTTCTTCGCCCAGCCGGAAACCGAGGC
330	502	list:330	TCCTCCACCCGCTGGGTGATTTCCTCGGTACG
331	503	list:331	TCCTGGTCGTCCTGCGCTCGTACGGCCATGGC
332	505	list:332	TCCTTGCCGCTCAGCTCGCCGATCTGCTTGTA
333	508	list:333	TCGAAGGGCTCGCCGGATTTTTCTTCCGCATAC
334	510	list:334	TCGACGCGATCCGCCGCGCCCTCGGCCTGGCC
335	511	list:335	TCGATCAGACGACCGTAGGTGCGCAGGCCTTC
336	513	list:336	TCGATGCGAGACTCCAGCCCGGTACGAGACAT
337	514	list:337	TCGCATTGCGCCTGCGTCATGATGCCCGACTC
338	516	list:338	TCGCCGGATTTCTCGGAAAAGTCCACCTGCT
339	517	list:339	TCGCCGGTGCGGCCGTGGGGCTACGAGCGGCC
340	518	list:340_C2-22:11_C8-13:9_C9-20:11	TCGCTCTGCACCAGCGGCGCATTGGATCTGGT
341	519	list:341	TCGGAATACTCCTGGGCGTCCTTACCAGGGAA
342	520	list:342	TCGGCGGCTACTACGCCGCCACAGAGGCTGTC
343	521	list:343	TCGGGCAGGCCGTCGTATCGTTCTTCGTGATC
344	522	list:344	TCGGGCTGCGCGGGTAATGGTGCAGCGCTCCA
345	524	list:345	TCGTAGCGCGGACTGATGTCGTTGCAGTACTT
346	525	list:346	TCGTAGCGCGGAcTGATGTCGTTGCAGTACTT
347	526	list:347	TCGTCACAACATGCCGGTCTTGTTTCAGTGAC
348	527	list:348	TCGTCATCCGGCGCGGCGCAGAACCGCACGTA
349	528	list:349	TCGTCGATCAGGGTTGTTGTAGATTGCAAAGA
350	529	list:350	TCGTCGTGGTTGTAGGCCGCCTGCCACGTCTT
351	531	list:351	TCTCCGGTCGGGTCAGCGTGACGGTCGTCAGT
352	533	list:352	TCTGGCGAAGAGCGGGATGACAAGGGCAGAGC
353	534	list:353	TCTTCCCGTATCAGGGCAAATGGAGCGAACGC
354	535	list:354	TCTTCGCCGCGCTGGATTCGAAGGAGCGCCGC
355	536	list:355_C3-7:13	TCTTCGCGTCCCTGGCCTTGGCTCGATACAGA
356	537	list:356	TCTTGGGAGTCCCGGCAGGTCAAGGGCCGCGA
357	539	list:357	TGACGCGATGCCTCATGCACGCCACGCGGCAG
358	541	list:358	TGACGTAGTGGCCGCCTGGCGCATGCACATGC
359	542	list:359	TGAGAGATCGGGCGCTTTGGGATGTGACCAAC
360	543	list:360	TGAGATCAAAGCGCGAGCAAACGTGCCTGGAC
361	544	list:361	TGAGTCGAAGGCCGATACCCGTGGCTCGTTCT
362	545	list:362	TGAGTTCTGAGACGATCGGCCTCGGCGATCCC
363	546	list:363_C9-11:5	TGATAAAACGAGTCAGGAAGGCCCCTGCGGGA
364	547	list:364	TGATCAAGATTCGCGTCGATGGCTGCAAGCTC
365	550	list:365	TGATCTTCTGGTGCTGACCTCTGGCGCAGAGT
366	551	list:366	TGCAAAGGGGCTGACGTTTGCCAGCACCTGGA
367	552	list:367	TGCAAGTGACCGCAGAGCGGGAGCGTGCTGAC
368	553	list:368_C10-5:2_C5-2:2_C6-1:2	TGCAGCGCCGCGAACGGCAACGGCGGCGACGG
369	554	list:369	TGCAGGATGAATGGCTTGTTCGGCAGGCCGTA
370	556	list:370	TGCCGGTGGCGGTGCCATGCCGGGTGCCGACG
371	558	list:371	TGCGCACGGAAGGCCTGCGCACCTACGGTCGG
372	559	list:372	TGCGGGACCGTGAACATGCGCCTCATCGGCGA
373	560	list:373	TGCGTGAACTCAAGGCCTTGGAACTCGCTCTG
374	562	list:374	TGCTCGTCGGGTTCGGAGTCGGCCCCGGGCAC
375	563	list:375	TGCTGGGCTTCTACAACCCGCGGGTGGTGCTG
376	564	list:376	TGCTTATCGGAGAAGCCCGGCGCGCCGAGGAT
377	565	list:377	TGGAACACACCGAGGGTCTCGCGCAGCGACCG
378	566	list:378_C10-5:3_C5-2:3_C6-1:3	TGGAACGCATTGCCTGCCTGCGTAAAGAACTC
379	568	list:379_C1-7:11_C2-3:11_C3-16:11	TGGACGAACCGCAGCAGCGGTACGACGTTGTT
380	569	list:380_C5-12:9_C6-4:3_C9-14:10	TGGACGGCCGCAAGACAGTCACGCGGCGAGTG
381	571	list:381	TGGAGGCGTCTTGTGAAGGCTCGCTGAGTCCT
382	572	list:382	TGGCCCTCCCTGAGTCGCCGCTGCTCGGTCCA
383	573	list:383_C6-4:9_C9-14:15	TGGCCGTCCCAGGCCTCTTGCGGTCTAGCCTC
384	578	list:384_C3-7:8	TGGGTGCGTCCACGCAGCAACTGGAAGATCTC
385	580	list:385	TGGTCATTACCGGAAACCGGATCACCGCGTGG
386	581	list:386	TGGTGCAGATGGCCGCCGCGCGGGTACACGTT
387	582	list:387	TGGTTACAGGCGGTCTGGATCGACGCCGGGCA
388	583	list:388	TGGTTCAGCATAGCGCCGGCCAGTTGTCGCAT
389	585	list:389	TGGTTCGGTCCTGGTCCTCGACGAATTGTGGC
390	586	list:390	TGGTTGGTATGCGTCTACGCCCTGCGCAAGAT
391	587	list:391	TGTAAGTGTCGCCCTCGGCCTGGCCGGAAGTT
392	588	list:392	TGTACAAGCACGCTTCGATTTCTGATCTTCTC
393	589	list:393	TGTAGCCCCTCACCGGGTAGTCCGAGACTATG
394	589	list:394	TGTAGTTGCCCTGCATGTTGATTTGCGTGGC
395	590	list:395_C1-1:1_C6-19:1	TGTCAGAAGGGATTACCGCGGACCTGGTCGCA
396	593	list:396_C10-5:4_C5-2:4_C6-1:4	TGTGCCGTCCGCGATCTGGCGGATTGCCGGCTA
397	594	list:397_C9-11:4	TGTTCCGAAGGCGTCAACGAAGGCTAATGACC
398	595	list:398	TGTTGTCGGATGATCTCGGCCAGCCACTCCGC
399	596	list:399	TTAAAGGTGCGTGATGGAATGGCTCGGCGCGAT
400	598	list:400	TTAGAAATTTGGGCCATGTTCAGGCTCCTCTT
401	602	list:401	TTCACAGCCAGCCTCAGCGCGTCGCCGTCGTC
402	603	list:402	TTCAGTTCGGTCAGCTTCGCGTTGAGGACACC
403	604	list:403	TTCATCGTGCCGATCGCGAACTGGTCGCGCGA
404	605	list:404	TTCCAGGGCCTTCAGGTCCGGGTAGTCCTTGG
405	607	list:405	TTCCCGGTGGCCGTCTCGACGATGTGGAAGAA
406	608	list:406	TTCGAAGACGACGAGATCACGCAGCAGCGTGA
407	609	list:407	TTCGAGGTCAGCGGCTTCGGCCCCGGCGAGCA
408	612	list:408	TTCGCTGGCGGCTTCGTTGGCTTCCTCGGCGT
409	613	list:409	TTCGGGCTGATCCATTCGCGCTCCGTACAAAT
410	614	list:410	TTCTCCGGGCGCGCCCTGGAGCCATCATTGCC
411	615	list:411	TTCTCGCCGGCCTGCTCTCCCAGACCGCCATA
412	616	list:412	TTCTTGCGTGACGGTGCGTCGGGCGCGAAGCC
413	618	list:413	TTGATCAATGCACTTCCGGTTCCGCAGTTTCT
414	621	list:414	TTGCCCGTAGAAGTACGTTTCCTGTGCCATGT
415	622	list:415	TTGCCGATCGAGCGCGCCACTCCCGCGCTGTT
416	623	list:416	TTGCGCTGGTAGCAGCCTGGAGAAAATACCCC
417	626	list:417	TTGCTTAGAACGCTCATGCGCCAGGCTGCTGT
418	627	list:418	TTGGAAACAGGGCTGCTTTGGATGTACCCAAG
419	628	list:419	TTGGCGGACTCGATGATCACCGAACTCACATG
420	629	list:420	TTGGGCAGTGCTGTTGGTCGAAACCACGTACC
421	630	list:421_C6-4:4	TTGTCCGTGCGCGGCGCCTTGGGCAGAGTGAA
422	631	list:422	TTTCGGGACTGCGGTCTGTACGCGGATTGAAT
423	632	list:423	TTTCTCCCGGCCATAGGGCCGAATGAAATTGA
424	633	list:424_C1-7:6_C2-3:6_C3-16:6	TTTGGTGAGGCTTGCGCTCCCTGGGTGTTCGA
425	634	list:425	TTTTCGACCGACGCGATGGCACAAGCAAACCT
426	635	list:426	TTTTCGGCCCAGATCACTTTGATGTGCGCAGC
427	636	list:427	TTTTCGTAGATCCCGACGTCGAGGCGCAGAGT
428		C10-1:1_C10-2:1_C3-13:1_C5-19:1_C5-5:1	CATGCTACGCCGGCCTTGATCAGTTCGCGAGC
429		C10-1:2_C10-2:2_C3-13:2_C5-19:2_C5-5:2	ACGAGCTGACGGAAAGTGATCCGGTAACGA
430		C10-1:3_C10-2:3_C3-13:3_C5-5:3	TTACTTCTACTCGCTCGCCGCCGGCTACCAGG
431		C10-1:4_C10-2:4_C3-13:4_C5-5:4	AGCAGCCGAGCGGGATCGTGCGTGAGCTGAGC
432		C10-1:5_C10-2:5_C3-13:5_C5-5:5	GGCCAGGTCGAGCCTGAGCCGCGCACGGTGCG
433		C10-1:6_C10-2:6_C3-13:6_C5-5:6	TGCTGCTGGATCTTGTTTCCGGGCCGGCGTGT
434		C10-1:7_C10-2:7_C3-13:7_C5-19:3_C5-5:7	AAGAACCGCACCGTCCACTGAGCGAAACCGCC
435		C10-1:8_C10-2:8_C3-13:8_C5-19:4_C5-5:8	ATCAAGTTCGACACGACTCGCTCCACGCAGTG
436		C10-1:9_C10-2:9_C3-13:9_C5-19:5_C5-5:9	TTATGCAGGACGACTGGCACGTCCGCATATTC
437		C10-1:10_C10-2:10_C3-13:10_C5-19:6_C5-5:10	CTCGGCATGCACGTCGACGCCGAGGCGCT
438		C10-1:11_C3-13:11_C5-19:7_C5-5:11	GTCATCGGACGAATCGCGTCACCAACCGCCCG
439		C10-5:12_C5-2:12	GTATGGCTCTCTCCATTGGGGTGGCGATACTC
440		C1-1:5	TGTCCGCAGCAGGCCGGTAATCCGGATAACTG
441		C1-1:6	TGTCCGACAACCCGCATAGCATCCCTGAGCAA
442		C1-1:9	AACATCCAGCCCGAGCTGAGCGATATCCCCCG
443		C1-1:10_C6-19:3	TGCTCGCTGATGACCAGCCGCAGCGCATGGTT
444		C1-1:13_C1-15:8_C6-19:6	GCAGTGATCGAGCGCGCACGGTCGCGCAAGAC
445		C1-1:16_C1-15:11_C6-19:9	AGTGAGCACGATCATCATGTCGGCCTGCTGGC
446		C1-11:1	GAGCTGGAGCGCCTGGCCGCCGAAGCCCTGGC
447		C1-11:2	ATCGTGCCGGATAGCAGCCGTTCGCCTAGGAC
448		C1-11:3	AAACGGGGCATGTGGTGGCAACGTACAGAAAG
449		C1-11:4	GATTCGCGTCGTAGACCTTGGTGGCCTCCGC
450		C1-11:5	ATCTCCACCACCGCTACCCGGATCAGTAGGGT
451		C1-11:7	TCCCGAGGAAACGCCATGCACACCCTCAACCT
452		C1-11:8	TTGCCGGTGGCCGTTTCGACGATGTGGAAGAA
453		C1-11:9	ACCGGCGCCGACTGGCCTTCGATCCAGATAAC
454		C1-11:10_C1-7:14_C2-3:14_C3-16:14	TGGTTCCGGCTCAAGCAGCGCAAGGAACTGAG
455		C1-11:11_C1-7:15_C2-3:15_C3-16:15	TCGACATGGCGACGGCTCTTGAACGGTTCTAT
456		C1-15:1	TCGCGGACGTACTCCAACTCCTGCCTCGCCTT
457		C1-15:2	ATCTGCTCCAGGGCGAGCAGGATGCCGTTGGT
458		C1-15:3	ATTGGCGGCATGAAGAAGAACCGCCTACACGT
459		C1-15:4	TGGAGAATTGGGTGCGCGCCGCGCCCTTTCGC
460		C1-15:5	TGAACCAGGACATCACCCTCGGATCGGCCAGC
461		C1-15:6	TGCTCCGGCCATGCCTGCTCCGGGCCTTTCTG
462		C1-15:10	AGTTGGCGAGCTGGGCAACGTTGCTTGTCGAA
463		C1-17:1	TGGATCACGACGGTGAGTCCTACACCTTTGGC
464		C1-17:2	AGCAGCAGATCATCGACAACGCCCGCGCTTCT
465		C1-17:3_C9-17:7	GAGAACGATTCCGTCTTGTTGGAGCTTTCTGT
466		C1-17:4_C9-17:8	CGACGAGCAACTGCGCTTGCGCGTGCGTAACC
467		C1-17:5_C9-17:9	GGAAGGCTGGCGCTCGAACGGATGTGTACAGG
468		C1-17:6_C9-17:10	TCCGGATCACCAGGGCGACAGATGGCCACCTC
469		C1-17:7_C9-17:11	CTCTGGCGGTAACCTTTCCATGATCTGCGCAGCC
470		C1-17:8_C9-17:12	TGCATGCACATCGGCGAACTGCTGACGTGCTT
471		C1-17:9_C9-17:13	TGGCGCCGCCCGATTTCACGTAGCTGCTCGAT
472		C1-17:10_C9-17:14	TGATATCCAGCTGCTCCAGGAACCGCTGGCGG
473		C1-17:11_C9-17:15	TGATTTCGAAGGCCGCGGGCGACTGATCCGGA
474		C1-17:12	TGGATCAAAGAACGCATTCTCGGCACGTCGAA
475		C1-17:13_C2-24:6_C9-17:16	TCCTTGCCGGGCGCGGCGGCGAGCAGTTCGCG
476		C1-17:14_C2-24:9_C9-17:17	GAGTGTGAGGCCGGGCAAACGGATTTGT
477		C1-17:15_C2-24:10_C9-17:18	TTGACGGCCAATGCCGGCTTCGACTTAGCTCG
478		C1-17:16_C2-24:12_C9-17:20	AGCCACTCGCGGGCCAGCTCGGGCGATAGCAC
479		C1-17:17_C2-24:13_C9-17:21	GTGTCGCCCAGCACCGTTCAGCGCTACTTCAT
480		C1-17:18_C2-24:14	TCGATCCACACCCGCGAGGACGTGGCCACCGT
481		C1-17:20_C1-7:13_C2-3:13_C3-16:13	TGCAGGTCATAGGCGTATTCGAAGGACAGGCT
482		C1-19:2	ATCCGGAAGGGCGGGCTCCATGCTGTTTCCGC
483		C1-19:3	ACAAACGGCGGGACGGCTGGCAACCTGAACCAA
484		C1-19:4	CGGAAATCGCGGCGGCCAGGGCTTCACCTGCT
485		C1-19:5	TTCTCATTGGCCTCGTCCAGGCTCGGCAGGTC
486		C1-19:6	TACCAGTGGCTGGTGAACGACGAGAACATGCT
487		C1-19:7	ATTCAGCCTTGGCGATGCACTTCTCCGCAGGC
488		C1-19:8	TTCAGCTGGGCGGTGGCGGCGGCGATCTGCTC
489		C1-19:9	TGCAACTGCTGGGCGACAAGCTGCTGCAGCTG
490		C1-19:10	TTGGAGAAGCGCCCGCTGGTGTCGAGCAGCTT
491		C1-19:11	CAGTCCGGCGCGAAGGTCCAGGCGATGATGCG
492		C1-19:12	TTCCTGGAGTACGACCTGATTGCCTCCGCGGA
493		C1-19:13	TACATCGAGGGGCGCCTGGCCGATGGCCGGAT
494		C1-19:15_C3-7:15_C8-4:15	TTACCTTTAAAAGGGCTTTAAAACGCCTTTTAG
495		C1-7:3_C2-3:3_C3-16:3	AGCAACACCAGCAGCAACGATTACAAGTGGTT
496		C1-7:4_C2-3:4_C3-16:4	TATAAGCATGGGTCTGATGTAGTTGTTCGAAC
497		C1-7:5_C2-3:5_C3-16:5	AGCCATTTCGGCGAAGGGACTGAAGAGGGCCT
498		C1-7:9_C2-3:9_C3-16:9	GTTCCATATCCAACACCGGGACGGGAGTCCGA
499		C1-7:10_C2-24:8_C2-3:10_C3-16:10	TCTACGAGCAGACCGAGTTGAAAGGACAGGAG
500		C1-7:12_C2-3:12_C3-16:12	TTGCGGATCCGGCGGTAGACGACCATCCGCAC
501		C2-21:1	TACAGCTCGATGCCGAGATCGAACAAGGGGGC
502		C2-21:2	AAGGAGTTCGAGGGGGGCGCGCTGTACTGCGC
503		C2-21:4_C5-14:2	TATCCGATGAACGTCCGCATCCCCGCGGCTGT
504		C2-21:5_C4-16:4_C4-17:4_C8-19:3	GGTAGACGCTGCCAGGTTAGCGGCCCGGCAGT
505		C2-21:6_C4-16:5_C4-17:5_C8-19:4	AGCTCGGCCAGCGCAGCCCGGCGCGCTTCGCC
506		C2-21:7_C5-14:3_C8-19:5	TTGCCCGCTCAGCGCTCAGGAACGACTGACCC
507		C2-21:8_C4-16:6_C4-17:6_C5-14:4_C8-19:6	AGACGATCCGCGCATTGACGACGGGCGGGCCG
508		C2-21:9_C2-21:13_C4-16:7_C4-17:7_C4-17:11_C5-14:5_C5-14:9_C8-19:7	AGCCGATGGCCCGCAGTAGTACCCCGATTAGT
509		C2-21:10_C4-16:8_C4-17:8_C5-14:6_C8-19:8	GTACCGGGGTGCTGCCAACCATACGAGGCGTT
510		C2-21:14_C4-16:12_C5-12:6_C5-14:11_C8-19:13	AGGGATCGCCGTCGAACGGCGACTTGCCCGGAA
511		C2-21:15_C5-12:7_C5-14:12_C8-19:14	ACTTGATGAACTTGCCGACGCTGGGCGCGAAG
512		C2-22:1_C9-20:1	ACGACCGCAAGACGCGGACCGATGGGGGTGCA
513		C2-22:2_C9-20:2	ATAGGGCCGAATGAAGTTGATGTGCTTGCCGA
514		C2-22:3_C8-13:1_C9-20:3	GCGAGGGCGTCGACGCACGCGACCGCGGCGAA
515		C2-22:4_C8-13:2_C9-20:4	AAGAACGGCTTCAGGCTGAAGCTAGATGCCTG
516		C2-22:5_C8-13:3_C9-20:5	ACGCTCGGGCCGGCCGCCAGCGGCAGCTCGGC
517		C2-22:6_C8-13:4_C9-20:6	AGCTTCCGGGCCGATGTTGCCGACCGTGGTAT
518		C2-22:7_C8-13:5_C9-20:7	TCAACGACAAGGAGCTGCTATCCATTCTCGAC
519		C2-22:9_C8-13:7_C9-20:9	ACTTCTGCGCCTGACGCGTCGGTCATGACGAT
520		C2-22:10_C8-13:8_C9-20:10	CAGCGCAACAGGCGCATAAGTTCGTTGTAGTG
521		C2-22:12_C8-13:10_C9-20:12	AAGCTCGCGCGGGCCTACGAGCAACACGCCAA
522		C2-22:13_C8-13:11_C9-20:13	GTAGTGCCGCCAGCACAGCGCCTCGACGGTGT
523		C2-22:14_C8-13:12_C9-20:14	AAAGAGGCTGCGCAGCACCGACGCACCTTCGT
524		C2-22:16_C9-20:16	CTGCAGTGGAAGACCTGGGTGCGTCTCGCCCT
525		C2-23:1	TATCGCCATGGTTACGTCACTCATCGCTGACT
526		C2-23:2	CGGCGCTCCGTTCGACGCGACAAGTCGCGACG
527		C2-23:3_C3-7:11	AACTGGTCGTGGCGCGGGATCACCGACCGACG
528		C2-23:4	ATAGGATGACTTCTGCGGTTGTGAAGTTTTTC
529		C2-23:5	TTGTCTGTCACCGAGTCGACCACACCAGAAGA
530		C2-23:6	TATACCCGACTTTTCAGCCCCGCCACCCTCGC
531		C2-23:7	AGGGGGTCAGAGGGCAGGGGGAGAAAAGCTTC
532		C2-23:8	CCAGGCGCCGGCTTCTTCCCAGGTGATGCCGG
533		C2-23:9	AGGATCGCGGCGGAATGATGTCTCGCGCCGAC
534		C2-23:10	ATTGGCTGTTGAAGCTCAGGATCGATAGTCAC
535		C2-23:11	TTGCTGTGCTTGAAGAAAAGGGGTTCGTCCAA
536		C2-23:12	GACCCCGCCTCCAGGCCGGAGCCACCTGCCTG
537		C2-23:13	TCGCCGCCCTCCATGGTCTGGCTCAGTTGGCC
538		C2-24:1	GAATGGGTCTGCCTCGGCGGGATCGACGTGGA
539		C2-24:2	CGAGTGCCGTCAACCGCTTGGACAACCTGCAT
540		C2-24:3	AGGCGGCGCAAAGTCGGCCAAGTCTTCACGCT
541		C2-24:4	TCAGCAGCAGGGAACCCGCGTGACCGTTGTTG
542		C2-24:5	ACAACGCCTTCGAAGACCTGGGCGGCTTCGTA
543		C2-24:7	TGTCCGGTCCCGGAAAAGACCAACGCGGGAGT
544		C2-24:11_C9-17:19	TCTGTCACCTCCTGGGAGGCGGCCTCGGCCTG
545		C3-7:1	ATCCGGGCAGACCGCCAATGGCGTGGTCCTGA
546		C3-7:2	TGGCCCGCTGGTGGGCAACGGGTGCGACCACG
547		C3-7:3	AGGATGAAAATTGCTAGCGATCGTCTCGATTG
548		C3-7:4	TCCGCAAGGGAGGGAGGGGAAGCTTTATCTCC
549		C3-7:5	TGCGGTTGGTGGCCTGAGATGCTGCGCGCTGA
550		C3-7:6	GTGCCGAGCTGACCGACAACAACAAGGTCAAG
551		C3-7:9	ACGTCTGAAACGACTTCACCGGGACGAAGCGG
552		C3-7:12	AGATCACCGAGCGCTATTCGGAGCCGGCCGAA
553		C4-16:1_C4-17:1	TACTGGAGGTGTCGGAGTTCGAGCCGAGCCAG
554		C4-16:2_C4-17:2_C8-19:1	TGATCGGAGCCCTCATTGCGCACGCTCCAGCC
555		C4-16:3_C4-17:3_C8-19:2	AACCAGGGCGGATAAAATCTGCCCTTCTGGAGG
556		C4-16:11_C5-12:5_C5-14:10_C8-19:12	TGATCCATCACCGCCTTGACACCAACAAAGGC
557		C6-4:1	AGGGCCATCAGCTGGCCCAGGCCGTCTTCGTT
558		C6-4:5	AAGACGAGTACCTGAAAGACACCACCGGCAAC
559		C6-4:6_C9-14:11	ACGATGGCCGGGTGATCGGTATCCCTGATCAC
560		C6-4:7	TGTATGACGACAGCGATTCGGAACGCTGCCGC
561		C6-4:8_C9-14:14	TGCAATGGGGCTGCTCGTTCTAACCGCACGGT
562		C6-4:14	GTGGCTATCGCGCTTGATGCGGGCCCGGTCGA
563		C6-4:15	AGCACGTGGCGCATAAGTCGGCTCAGCAGCTC
564		C7-11:1_C8-12:1_C9-1:1_TR60:1	ATCACCGGCGCGCTGGCCTTCGGCGCCCAGGC
565		C7-11:2_C8-12:2_C9-1:2_TR60:2	TTATCAGTAAATACGTGGCGACTTGGCCACCC
566		C7-11:3_C8-12:3_C9-1:3_TR60:3	TTGCTGCGTGTTGCAGCGACACCCGTTCAACA
567		C7-11:4_C8-12:4_C9-1:4_TR60:4	ACTGGAGATACGTGCACAGATCGGACGACACG
568		C7-11:5_C8-12:5_C9-1:5_C9-11:6_TR60:5	ATATCAGTTTGCATGGTTTGCTCCTACCAAGC
569		C7-11:6_C8-12:6_C9-1:6_C9-11:7_TR60:6	TTGCATCGCACCCTCCTGCTCACCGACCAGGC
570		C7-11:7_C8-12:7_C9-1:7_C9-11:8_TR60:7	TGAACGTTCACGCATCACGCGCCTTTCCGGCC
571		C7-11:8_C8-12:8_C9-1:8_C9-11:14_TR60:8	AGGCAGACGAGTACGCGCGGTCTCGCGAAGTG
572		C7-11:9_C8-12:9_C9-1:9_TR60:9	AGAACATGGCCCGGCTCCCGACGTTGCTGCGG
573		C7-11:10_C8-12:10_C9-1:10_TR60:10	ATGACGCGGACGAGCTTGTCCGCCTTCTGGC
574		C7-11:11_C8-12:11_C9-11:15_TR60:11	GTTTGCAGGAAGCGGCGCTATCGCACCGAACT
575		C7-11:12_C8-12:12_C9-1:11_C9-11:16_TR60:12	ATAGCTACGCCGAGCCAGTTGTAAGCTGACGC
576		C8-17:1_C8-5:4	ATTGAAGAAGCTGAGCAGGAGCACCACGCAGA
577		C8-17:2_C8-5:5	GCGAAGGTAATGCGGGACAGGTCCATGCATGG
578		C8-17:3_C8-5:6	TTCAGAGGGTTCCAGGTGGCCCGGTTATCCCA
579		C8-17:4_C8-5:7	TTGCGCTTGTCGACTTCCGTGTTGATGAGCGC
580		C8-17:5_C8-5:8	TTGCGGAGTAAATCGACTGATGCGCGCTTCAT
581		C8-17:6_C8-5:9	AAGAACCGCTGGCGGCCGGCTCGCTGAACATT
582		C8-17:7_C8-5:10	CTTCTGGCAGTCGGCTCACGGCGACTCGCGCG
583		C8-17:8_C8-5:11	TTTGAGTTGTTTTCGAAGCTGCTCGAGGGCAG
584		C8-17:9_C8-5:12	AGATGCAGACGTGGCTTATGTGCACTTTCCCC
585		C8-17:10_C8-5:13	TCGCATGGAGGAGTTGGCCAAGGCAACTGGCG
586		C8-17:11_C8-5:14	GAGGACGCGTGCGTCTTCTTGTCCGCGTGTTT
587		C8-17:12_C8-5:15	TGGTGCCAGGCCTGGATCCGAGCAAGCCGGTA
588		C8-17:13_C8-5:16	TGGAGCAATCCCGCCCGGTGGCGACTACTGGA
589		C8-17:14_C8-5:17	AGTTGGGCGAGCGATTCGGCAGCGGCTCGGCC
590		C8-4:1	ACCAATGGACCAGCAATCGAACTCAAGAACGA
591		C8-4:2	ACCGAATCCGCGACTCGTACCGAGTCGCAAAC
592		C8-4:3	GGGTGGCGGAACCGACTGCCGAATATCACTCC
593		C8-4:4	CTCTCCTGAGCGCTGAGGATGCAAGAGCCCGC
594		C8-4:5	TTCCGCCAGTTGCCGAAGCGCCCGAAATAGAG
595		C8-4:6	TGAACAACCCGGCGCTGCGCGACTATCTGCCG
596		C8-4:7	GGCAAGCCATTGATCAGCAGGCCGGTATTCGG
597		C8-4:8	TATGCCGCCCAGCGTGCCGCCCAGGGCGCCGC
598		C8-4:9	ACGAACAGCGCTGCGAACTCGCCAAGGTCTGG
599		C8-4:10	TATCGAAGAGTGATCTGCGCTGCTGTGGCGCA
600		C8-4:11	TCGTAATCATTGAAGCCCCGGGCAAGCTGAAA
601		C8-4:12	ATGGGGTCTACATCAGCGATGCGGCTCTGTCC
602		C8-4:13	ACTTGCAGAAGCCCCAGGACTTGAAGCCACTG
603		C8-5:1	CTGATGGCTGAGAATGTCGGCAGCATCTACTA
604		C8-5:2	TGTGACGCCGTGCTTCAGCAGGCAGCGCGCGA
605		C8-5:3	AGGGAATGGCTGACATTCCTCTAGCGCCCGCT
606		C9-11:13	TATGACCCGTCGTACGACTACGCCTCGAACAC
607		C9-14:1	GCGATGGTTCGGCGCGCCCGTATGGCACATGC
608		C9-14:2	TTGGGCATGCGATTGCGCGCGCGGAGTGAATT
609		C9-14:3	AACGAAAACGCCGAAATCGGCCGCGACCGCGAC
610		C9-14:4	ATGGACGGAACCGATTCCGACTCGGTCGACGC
611		C9-14:5	TTCAGCGTCGCGGCAACCATAACCAGGCTGTG
612		C9-14:6	ATCCCGACGACCTCCTCGCCGAGATCCAGGCG
613		C9-14:7	ACCCAGGTTGCTGAATACGTAGTCCTTGGCCT
614		C9-14:8	GAACATCTGCAGCAGCGCCCACAGCGTGCTGG
615		C9-14:9	ACTCCGGCTCAGCCACCGGCAGTACCCCGGCC
616		C9-14:12	TGACCCTTGGAAACGCCGTTCCAGGGCTTGAT
617		C9-14:13	TTGGAGCGTCTGACCTGGGTGGTGACCACATT
618		C9-17:1	ATCCTATCGACGACAAAGTGCTCGAGCATCTC
619		C9-17:2	TGCCGGACCTGCTCCGCCACTGCGGACTCCAA
620		C9-17:3	AGAAAGCCAAGATCTACCGCTGGAGAAAGGCG
621		C9-17:4	GAAGAACATCGCTGCGGCGATCTGGGCCTCGC
622		C9-17:5	AGGGGTTCGTCCCTGGCCGAGGTGGCCCGCTC
623		C9-17:6	AGGAAACCAGAGCAGGAGGATGGACTATGACC
a	The spacer number is that of Cady et al. [Cady, 2011 #1376].
